# Supplementary material for: Self-construal priming modulates sonic seasoning
Source: Front Psychol. 2023 Apr 3;14:1041202. doi: 10.3389/fpsyg.2023.1041202 (PMC10106597; doi:10.3389/fpsyg.2023.1041202)
Supplement: Supplementary file 2 [file Table_2.XLSX]

## Sheet: Sheet1
SubjectID	Sex（male=1，female=2）	Age	Height	Weight	BMI (Body Mass Index)	Degree of hunger	Score of independent self-construal	Score of interdependent self-construal	Type of self-construal priming (independent = 1,interdependent =2)	Baseline positive emotion score	Baseline negative emotion score	Negative music -Rating of the sweetness of chocolate	Negative music -Rating of the bitterness of chocolate	Negative music - Liking of chocolate	Negative music - Rating of the purchase intention	Negative music -WTP (Willing To Pay)	Negative music - Score of positive emotion	Negative music - Score of negative emotion	Positive music -Rating of the sweetness of chocolate	Positive music -Rating of the bitterness of chocolate	Positive music - Liking of chocolate	Positive music - Rating of the purchase intention	Positive music -WTP (Willing To Pay)	Positive music - Score of positive emotion	Positive music - Score of negative emotion	Frequency of eating chocolate	Type of chocolate (dark=1,milk=2)	Group (independent-dark = 1; independent-milk = 2; interdependent-dark = 3; interdependent-milk = 4)
1	2	18	165	50	18.3655	25	4.46667	5.33333	1	3.44444	2.11111	4	1	7	7	1	2.22222	2.22222	2	7	1	1	5	2.875	2.66667	3	2	2
2	2	18	173	67	22.3863	50	4.26667	5.53333	2	1.77778	1.22222	4	5	3	2	0.3	1.66667	1.22222	4	3	5	3	0.5	1.55556	1.11111	3	1	3
3	2	19	153	48	20.5049	50	4.73333	5	2	1.11111	1.11111	3	2	6	6	1	1.33333	1	2	3	4	5	1	1.44444	1	2	1	3
4	2	19	168	53	18.7783	70	4.13333	4.2	2	2.88889	1.55556	5	3	6	3	1	3.44444	1.11111	6	2	6	6	1.3	1.88889	1.22222	2	2	4
5	2	19	160	55	21.4844	50	4.66667	5.06667	1	1.66667	1	3	5	3	2	1	1	1	5	2	6	7	5	1.66667	1.33333	4	1	1
6	2	19	164	51	18.9619	55	4.6	4.8	2	1.77778	1	3	4	4	3	0.3	1.55556	1.22222	4	3	5	4	0.3	1.88889	1.33333	2	2	4
7	2	19	158	46	18.4265	10	3.66667	4.73333	1	1.44444	1	2	6	1	1	0.5	1.33333	1.55556	3	2	3	2	1	1.66667	1	3	1	1
8	2	18	164	53	19.7055	70	4.86667	5	2	1.77778	1.11111	6	1	6	5	1	1.88889	1.88889	5	1	7	6	2	2.11111	1	2	2	4
9	2	19	159	50	19.7777	40	4.66667	5.46667	2	3.55556	1	5	4	5	5	8	2.88889	1	6	3	6	5	10	1.88889	1	3	1	3
10	2	19	158	48	19.2277	70	5.13333	5	2	2.55556	1	5	1	7	6	2	3.55556	1	6	1	6	5	1	2.22222	1.88889	2	2	4
11	2	19	150	43	19.1111	1	4.46667	4.66667	1	1.88889	1.44444	1	4	3	1	5	1.77778	1.44444	2	4	4	6	10	2.11111	1	2	1	1
12	2	19	158	44	17.6254	5	4.6	5	2	2	1.11111	4	3	5	4	3	1.11111	1.44444	5	2	6	5	3	1.66667	1	3	2	4
13	2	19	158	51	20.4294	50	4.73333	4.2	1	1.44444	1.33333	5	3	5	5	0.6	1.44444	1.77778	2	5	5	3	0.5	1.55556	1	2	1	1
14	2	19	163	56	21.0772	65	4.93333	4.93333	1	2.55556	1	6	2	6	6	1	1.88889	1	6	2	6	4	1	1.66667	1	3	2	2
15	2	19	160	50	19.5312	90	4.73333	5.13333	1	2.55556	1.88889	4	2	7	5	1	1.77778	3	7	2	7	6	2	2.44444	1.22222	3	2	2
16	2	18	172	57	19.2672	20	4.33333	4.53333	1	2	1	4	2	2	2	0.4	1.33333	1.66667	3	4	4	3	0.6	1.55556	1.11111	3	1	1
17	2	20	166	68	24.677	30	4.2	4.4	1	1.88889	1.33333	2	2	4	2	0.5	1.77778	1.22222	4	2	2	2	1	1.66667	1	2	1	1
18	2	18	163	70	26.3465	60	4.46667	5.06667	1	1.77778	1.33333	1	6	2	1	5	1.11111	1.77778	2	4	3	3	15	1.77778	1.55556	2	1	1
19	1	20	163	63	23.7118	57	5.13333	2.6	2	3.66667	2.66667	2	1	2	1	0	2.33333	1.77778	2	4	7	4	0.02	3.77778	1.44444	3	2	4
20	1	20	160	45	17.5781	50	5	4.73333	2	3.22222	1.11111	2	5	1	2	0.5	3.33333	1	6	1	4	1	0.5	3.33333	1	3	1	3
21	1	20	160	51	19.9219	60	4.33333	4.73333	1	2.77778	1.11111	6	3	6	5	2	2.77778	1.55556	3	4	4	2	1.5	2.77778	1.11111	3	1	1
22	2	22	174	64	21.1389	75	4.06667	4.53333	2	2.11111	1.22222	2	4	4	2	0.5	1.66667	1.22222	3	1	3	3	0.5	2	1	3	2	4
23	2	23	182	75	22.6422	60	5.13333	4.6	1	2.55556	1.55556	3	6	4	1	0.75	2.55556	1	6	3	6	2	0.75	2.66667	1	2	2	2
24	2	19	187	76	21.7335	80	5	4.13333	2	2.77778	1	6	1	5	5	0.3	2.44444	1.66667	6	1	6	6	1	3.66667	1	2	2	4
25	1	23	165	53	19.4674	45	4.53333	5.06667	2	2	1	3	5	3	3	0.1	1.44444	1.44444	6	1	6	6	0.5	2.77778	1	2	1	3
26	1	19	163	62	23.3355	50	4.86667	5.73333	1	1.22222	1.11111	6	3	5	3	2	1.77778	1	5	3	4	1	3	1.11111	1.33333	3	1	1
27	1	19	162	49	18.6709	50	4.33333	4.33333	1	3	3	6	1	5	5	0.2	1	1.33333	7	1	7	5	0.2	1.33333	1	3	2	2
28	1	20	158	52	20.83	65	4.73333	5.66667	2	2.33333	1	2	4	2	2	0.5	1.44444	1.55556	3	2	4	3	1	1.77778	1	2	2	4
29	1	19	162	49	18.6709	50	4.66667	5.13333	2	1.88889	1.22222	4	4	6	5	3	1.66667	1.11111	3	3	3	4	2	1.77778	1.22222	3	1	3
30	1	20	163	52	19.5717	1	5.53333	4.93333	1	2.33333	1	3	5	5	5	1.5	1.66667	1.55556	5	3	6	6	2	2.44444	1	2	1	1
31	2	19	182	55	16.6043	60	3.93333	4.4	2	3.11111	1	3	2	4	3	0.5	1	1.22222	5	2	6	4	1	1.66667	1	2	2	4
32	2	20	177	52	16.598	60	5.33333	3.46667	1	3	2.22222	5	6	4	2	0.5	2.77778	2.44444	5	2	6	4	0.5	3	1.55556	3	2	2
33	2	20	179	75	23.4075	70	5.2	5.46667	2	1.55556	1	4	3	5	4	0.1	1	1	5	3	6	5	0.1	1.33333	1	2	1	3
46	1	19	161	48	18.5178	75	4.33333	4.53333	1	1.44444	1.55556	3	1	3	2	0.5	1.55556	1.5	6	1	6	6	1	1.88889	1	4	2	2
47	2	20	191	73	20.0104	30	4.93333	4.73333	2	1.88889	1.22222	1	2	4	1	1	1.33333	2.5	1	6	5	2	2	1.66667	2	2	1	3
48	1	18	163	49	18.4425	50	4	5.2	2	3.66667	1.33333	6	1	4	2	1	3.44444	1.375	6	1	4	2	1	3.33333	1.22222	3	2	4
49	1	20	175	65	21.2245	25	5.13333	4.73333	1	2.22222	1	5	1	4	3	0.5	1.33333	2.25	3	5	6	4	0.5	2.22222	1	4	1	1
50	1	19	168	56	19.8413	20	4.86667	4.93333	1	3.44444	1	1	5	1	1	0.1	1.88889	2.125	3	4	3	3	1	2.11111	1	2	2	2
51	1	23	172	57	19.2672	80	3.33333	4.06667	1	2.22222	1.55556	3	5	2	2	0.5	1	3	5	2	5	6	2	2.55556	1.11111	2	2	2
52	1	26	159	68	26.8977	20	4.66667	4.93333	2	1	1	2	5	1	1	0	1	2.875	3	4	5	6	10	1.44444	1	4	1	3
53	1	19	165	72	26.4463	50	3.86667	4.2	1	2.22222	1	4	1	7	6	1	1.88889	1.125	7	1	7	7	2	4.11111	1	2	2	2
54	1	19	150	41	18.2222	80	5.33333	5.26667	2	2.44444	1	2	2	3	3	0.9	2.44444	1	3	4	6	6	0.8	2.33333	1	3	1	3
55	2	18	172	55	18.5911	20	5.53333	5.26667	1	2.33333	1	5	1	5	2	0.38	2.77778	1	5	2	5	2	0.38	2.44444	1	2	2	2
56	1	19	172.4	72.2	24.292	20	4.53333	4.86667	2	3.77778	2.33333	6	1	4	3	0.5	3.88889	2	6	1	5	3	0.5	4	2	2	2	4
57	2	19	177	64	20.4284	10	5	5.8	2	1.33333	1	5	1	5	4	0.2	1.22222	1.75	3	1	4	4	0.2	1.44444	1.11111	2	2	4
58	1	22	165	60	22.0386	40	6.33333	6.06667	1	4.22222	2.11111	3	6	6	4	5	4	2	6	2	6	2	6	4.44444	2	2	1	1
59	1	25	159	47	18.591	5	4.66667	4.46667	2	2.44444	1.11111	2	2	2	2	5	1.22222	1.125	3	1	5	3	10	1.33333	1	3	1	3
60	1	19	159	55	21.7555	90	4.93333	5.13333	2	1.88889	1.44444	2	5	5	4	0.1	1	1.625	4	2	5	4	0.5	1.66667	1.11111	2	1	3
61	1	20	158	60	24.0346	60	4.73333	6.2	2	1.66667	1.44444	4	3	3	2	0.01	1	1.125	2	4	4	5	0.01	2	1	3	1	3
62	1	19	158	53	21.2306	1	4	5.2	1	3	1.11111	6	1	6	5	2	2.88889	1	6	1	6	6	2	3.11111	1	3	2	2
63	1	19	155	49	20.3954	50	4.66667	5.06667	1	1	1	3	1	2	1	2	1	1	2	2	1	1	1	1	1	1	2	2
64	1	20	183	65	19.4094	75	5.46667	5.73333	1	4.22222	2.22222	6	2	6	5	0.07	3.55556	1.44444	6	1	6	6	0.08	3.88889	1.55556	2	2	2
65	2	24	164	53	19.7055	30	4.26667	4.4	1	1.88889	1	4	1	6	2	0.6	1.77778	1	4	4	5	4	0.6	1.66667	1	3	2	2
66	2	24	150	45	20	50	4.26667	4.33333	1	2.44444	1.44444	3	4	3	3	0.5	1.33333	1.88889	3	4	4	2	0.1	1.88889	1.44444	3	1	1
67	2	23	164	49	18.2183	20	5.53333	4.6	1	3.88889	1	3	1	4	2	1	3.33333	1	3	2	3	1	1	3.33333	1	2	1	1
68	2	20	156	44	18.0802	25	5	3.46667	1	3.44444	1.44444	6	1	6	4	5	2.11111	1.55556	6	1	7	5	5	2.55556	1.22222	3	2	2
70	2	20	160	51	19.9219	1	5.8	4.2	2	3.22222	1.44444	2	6	2	1	0.5	2	2.66667	4	1	6	6	1.5	2.88889	1.22222	3	1	3
71	2	21	172	64	21.6333	50	4.26667	4.73333	1	2.55556	1.22222	1	5	1	1	1	1.66667	2.55556	4	1	7	7	3	3.44444	1	2	2	2
72	2	20	167	56	20.0796	40	4.26667	5.13333	1	2.22222	1.11111	2	2	5	4	0.5	1.33333	1.33333	4	2	6	5	1	2	1	2	1	1
73	2	18	162	60	22.8624	45	4.8	2.13333	2	2.44444	2.77778	2	1	3	3	0.05	2.44444	2.55556	1	1	1	1	0.01	2.22222	2	3	2	4
74	2	20	159	53	20.9644	10	3.73333	5	1	1.88889	1.88889	6	2	5	4	2	1.33333	1.66667	3	5	6	5	3	2.11111	1.11111	2	1	1
75	2	25	160	51	19.9219	1	4.06667	4.06667	2	1	1	2	5	6	5	0.5	2.22222	1	5	2	6	5	0.8	2.22222	1	2	1	3
76	2	20	155	43	17.898	1	4.06667	4.73333	1	2.22222	1.11111	7	1	3	1	1	1.22222	1	5	1	6	6	1	1.66667	1	2	2	2
77	1	22	182	74	22.3403	30	4.46667	4.13333	1	3.22222	1.11111	3	6	4	4	0.5	2.55556	1	6	2	6	6	0.6	3.22222	1	2	2	2
78	1	19	183	70	20.9024	50	5.13333	4.66667	2	2.11111	1	5	5	5	4	0.5	1.33333	1.11111	5	4	5	5	1.99	2.11111	1.11111	2	1	3
79	2	20	160	48	18.75	70	4	4.8	1	1.66667	2	7	2	6	6	2	2.88889	1.55556	3	6	4	5	0.5	1.22222	2.44444	3	2	2
80	1	19	187	67	19.1598	50	4.66667	5.46667	2	2.66667	1	4	1	7	5	0.5	2.11111	1	5	1	7	6	0.5	2.33333	1	3	2	4
81	1	19	189	90	25.1953	50	5.33333	5.8	2	2.55556	1	4	4	6	5	0.5	1	2.11111	6	2	6	4	0.5	3.77778	1	2	1	3
82	1	18	185	105	30.6793	50	5.53333	5.66667	1	3.11111	1.22222	4	2	4	2	1	2	1.55556	4	1	2	2	1	3.11111	1	2	1	1
83	1	20	172	63	21.2953	50	4.4	4.26667	1	1.55556	3.11111	5	4	5	5	0.5	1.88889	2.22222	5	2	6	5	0.4	2	1.66667	2	2	2
84	2	22	164	54	20.0773	30	5.2	4.53333	1	2.55556	1.33333	2	4	2	3	3	1.33333	1.66667	4	5	5	5	5	2.33333	1	3	2	2
86	2	18	162	50	19.052	40	4.66667	4.46667	2	3.11111	1.11111	6	1	5	3	0.2	3.22222	1	6	2	5	4	0.2	3.33333	1	2	2	4
87	2	19	150	37.5	16.6667	30	4.33333	3.73333	2	1.44444	1.55556	3	3	3	2	2	1.11111	1	3	6	5	2	3	1.11111	1.11111	3	2	4
88	2	19	165	57	20.9366	40	4.4	4.46667	2	2.11111	1	5	2	6	2	0.1	2.55556	1	5	1	6	5	0.2	2.44444	1	3	2	4
89	2	19	155	94	39.1259	50	5	4.4	1	1	1.55556	2	2	2	1	0.5	1	1	5	1	5	1	0.5	1.88889	1.11111	2	2	2
90	2	19	162	49	18.6709	10	4.33333	4.13333	2	1.88889	1	1	1	4	2	0.5	1.66667	1.22222	2	1	5	2	0.7	1.44444	1	4	1	3
91	2	19	162	50	19.052	70	4.2	4.93333	2	2.66667	1.33333	3	4	3	4	1	1.44444	1.33333	5	1	6	6	1.5	2	1	4	2	4
92	2	19	167	48	17.2111	10	5	5.2	1	3	1	3	1	3	2	10	2.44444	1	3	2	3	3	9.9	2.55556	1	3	1	1
92	2	20	164	46	17.1029	65	4.06667	4.93333	1	2.55556	1.44444	3	2	3	2	1.5	1.66667	1	2	1	4	3	1.5	1.77778	1	4	2	2
93	2	20	165	47	17.2635	5	4.46667	4.46667	1	2.22222	1	3	1	6	5	2	1.44444	1.11111	5	2	6	6	2	2.55556	1	4	2	2
94	2	20	166	52	18.8707	70	4.26667	4.73333	2	1.33333	1.22222	3	5	5	3	1	1.55556	1	2	2	1	1	0.5	2	1	2	1	3
95	1	18	172	67	22.6474	30	4.06667	5.73333	2	2.55556	1.22222	4	4	4	5	0.5	2.33333	1	5	3	6	4	0.5	2.55556	1	2	1	3
96	2	19	173	75	25.0593	88	5.13333	4.93333	2	3.88889	1.33333	6	3	5	5	0.5	3.11111	1	6	2	6	6	0.5	4	1	2	2	4
97	2	22	162	50	19.052	20	4.13333	4.53333	1	2.55556	1	2	6	7	4	0.5	1	1.66667	5	2	7	7	1	2.22222	1	2	2	2
98	2	21	155	51	21.2279	80	4.8	4.4	1	2.55556	1.22222	1	6	2	2	0.5	1.66667	1	3	6	4	4	1	1.55556	1	2	1	1
99	1	20	172	70	23.6614	55	4.8	5.13333	1	1.55556	1	5	3	5	5	0.4	1	1.33333	7	1	3	5	0.5	1	1.22222	4	2	2
100	2	23	165	52	19.1001	20	5.26667	4.46667	2	3.22222	1	1	6	1	1	0.1	1	2.77778	3	5	4	2	0.5	4.44444	1	2	1	3
201	2	21	161	48	18.5178	60	4.26667	4	1	2.11111	1	4	1	6	4	0.5	1.77778	1.11111	7	1	6	5	1	2	1	2	2	2
202	2	22	164	48	17.8465	1	4.46667	4.8	2	2.22222	1	1	3	3	2	0.19	1.88889	1	5	1	3	3	0.18	2	1	3	1	3
203	2	18	160	48	18.75	40	4.06667	5.06667	1	2.77778	1.11111	5	5	3	3	2	1	1.22222	4	2	5	4	3	1.88889	1	2	1	1
204	1	19	183	75	22.3954	30	3.06667	4.73333	1	2	1.44444	4	1	5	4	0.5	1.55556	1.33333	5	2	6	5	0.5	2.11111	1	2	1	1
205	2	23	160	50	19.5312	1	5.8	4.93333	2	3.66667	1	2	1	7	5	0.1	3.11111	1.44444	5	1	7	7	1	4.44444	1.44444	2	2	4
206	2	18	162	48	18.2899	30	4.53333	4.8	2	1.66667	1.11111	3	4	6	5	2	1.11111	1	5	1	5	5	2	1	1.22222	2	2	4
207	2	21	163	68	25.5937	15	5.13333	4.8	2	2.33333	1.11111	3	6	6	5	0.5	1.33333	1.55556	4	6	6	5	0.3	1.77778	1.11111	2	2	4
208	2	18	157	55	22.3133	1	4.53333	5.33333	1	2.44444	1	1	7	3	1	0.1	1.55556	1.66667	3	6	4	2	0.1	2.66667	1	2	1	1
209	2	18	163	50	18.8189	50	2.86667	4.73333	2	1.77778	1.11111	4	2	6	5	0.5	1.66667	1.11111	3	5	3	3	0.5	1.44444	1	2	2	4
210	2	19	162	60	22.8624	2	4.93333	4	2	2.66667	1	1	5	2	2	0.1	2.44444	1	1	3	5	4	0.5	2.33333	1	2	1	3
211	2	18	169	60	21.0077	50	4.6	4.66667	2	1.44444	1.11111	4	1	6	6	0.08	1.33333	1	5	1	6	5	0.08	1.44444	1	2	2	4
212	2	20	166	60	21.7738	30	3.06667	4.6	1	1.33333	1	2	4	6	5	15	1.11111	1.55556	5	1	6	2	10	1.66667	1	2	1	1
213	2	21	167	50	17.9282	10	4.53333	5.2	2	2.77778	1.11111	6	1	5	5	3	2.77778	1.22222	6	1	6	6	3	2.77778	1.11111	2	2	4
214	2	18	158	46	18.4265	50	4.4	4	2	3.22222	1	2	3	3	4	0.1	3.11111	1.22222	3	3	3	3	0.1	3	1	3	1	3
215	2	22	166	58	21.048	1	2.8	3.86667	1	1.22222	1.22222	2	1	2	2	0.3	1	1	3	1	4	4	0.5	1	1	2	2	2
216	2	20	156	41	16.8475	30	4.06667	5.4	1	2.77778	1	1	4	2	2	2	1.77778	1.88889	5	1	5	6	3	2.77778	1	2	1	1
217	2	20	162	50	19.052	80	3.66667	4.93333	2	2.11111	1.11111	5	1	6	5	0.2	1.33333	2	5	2	6	3	0.2	1.55556	1.33333	2	2	4
218	2	22	160	55	21.4844	60	4.66667	4.53333	2	1.66667	1	2	3	6	5	1	1	1	2	1	6	4	1	1	1	2	1	3
219	2	22	162	58	22.1003	80	4.53333	4	2	3	1.33333	4	1	6	5	1	2.11111	1	4	1	6	4	1	2.77778	1	3	2	4
220	2	23	158	95	38.0548	30	3.66667	4.33333	2	1.88889	1	1	1	1	1	0	1.22222	1.11111	2	2	3	5	1	1.88889	1	2	1	3
221	2	22	157	47	19.0677	60	4.66667	4.93333	1	2.33333	1.22222	5	1	4	3	0.1	1.88889	1	6	1	4	3	0.1	1.77778	1.11111	2	2	2
222	2	21	155	48	19.9792	60	4.73333	5.66667	2	2.33333	1.11111	1	6	2	1	0.5	1.11111	2	4	5	4	4	0.5	1.66667	1.22222	2	1	3
223	2	21	151	48	21.0517	20	5.53333	3.66667	2	1	1	7	1	2	2	2	1	1.88889	5	1	6	6	20	1	1.55556	2	2	4
224	2	19	170	55	19.0311	10	4.33333	4.6	1	2.33333	2.55556	1	4	2	1	0.5	1	2.22222	3	4	5	3	2.55	2.11111	1.11111	2	1	1
225	2	19	171	61	20.8611	20	4.4	5.6	2	2.44444	1.22222	4	1	5	5	0.5	1.11111	2.11111	6	1	6	6	0.5	2.33333	1	4	2	4
226	2	20	160	40	15.625	1	4.53333	4.2	1	3.66667	1	4	3	2	2	0.1	2.55556	1.55556	2	3	5	3	0.5	2.77778	1	3	1	1
227	2	19	163	58	21.83	50	5.06667	3.8	1	3	1	5	2	5	6	3	3.22222	1.11111	5	2	5	6	3	3.22222	1	3	2	2
228	2	20	160	62	24.2188	40	4.86667	3.6	1	3	1.77778	2	1	2	4	0.5	2.11111	1.33333	3	4	6	4	0.5	2.88889	1.11111	2	1	1
229	2	23	163	49	18.4425	90	4.46667	4.8	1	1.44444	1	6	1	7	6	0.5	1.44444	1	6	1	6	6	0.5	1.22222	1	2	2	2
230	2	22	163	50	18.8189	20	5.26667	4.93333	1	2.22222	1	1	2	5	4	1	1.66667	1.22222	3	2	5	6	3	3.22222	1	2	2	2
231	2	22	160	69	26.9531	70	5	6.06667	2	2.55556	1	4	1	6	6	0.5	2.33333	1	5	1	7	7	1	3.11111	1	2	2	4
232	2	23	168	56	19.8413	10	5.33333	6	2	3.22222	1.33333	3	4	6	3	0.5	2.77778	1.88889	2	5	2	2	0.3	3	3	2	1	3
233	2	19	169	50	17.5064	10	6.06667	4.46667	2	1.66667	1	2	6	2	2	1	1.44444	1	2	5	6	6	1	1.77778	1	2	1	3
234	1	20	183	65	19.4094	20	4.06667	4.6	1	1.44444	1.66667	6	1	6	5	0.5	2.66667	1	4	3	4	4	0.3	1	1.22222	3	1	1
235	2	20	156	54	22.1893	50	4.4	5.2	2	3.22222	1.44444	4	3	3	1	0.01	1	2.33333	6	1	6	6	0.5	4	1	2	2	4
236	2	24	167	55	19.721	80	5.13333	5.2	1	2.77778	2.44444	2	2	3	2	0.1	2.66667	1.33333	4	4	4	2	0.1	1.66667	1	4	1	1
237	2	23	157	49	19.8791	30	4.93333	4.86667	1	3	1	1	5	2	2	0.5	1.11111	1.66667	2	5	5	5	1	1.77778	1.22222	2	1	1
238	2	21	160	56	21.875	2	4.93333	4.93333	2	4.55556	2.11111	6	1	6	5	0.5	1.22222	1.33333	2	2	5	5	1	1.66667	1	2	2	4
239	2	21	160	61	23.8281	50	5.6	5.4	2	3	1.11111	3	4	5	5	0.5	3.11111	1	5	4	5	5	0.5	3	1	4	1	3
240	2	19	164	53	19.7055	70	4.93333	4.66667	1	2	1	3	5	3	4	0.3	1.88889	1	3	3	5	4	0.3	2.88889	1	2	1	1
241	2	21	164	55	20.4491	61	4.53333	4.73333	2	2	1	3	1	5	3	3.1	1.44444	1	2	1	2	2	2.1	1.44444	1	2	2	4
